# Supplementary material for: Down on heights? One in three has visual height intolerance
Source: Springer Nature journal article supplement (doi:10.1007/s00415-012-6685-1), 2012-10-16
Supplement: 415_2012_6685_MOESM1_ESM.pdf [file 415_2012_6685_MOESM1_ESM.pdf]

## CATI Survey on Visual Height Intolerance Population ≥ 14 years of age

The following variables are taken from the general statistics section

Information on area code and postal code: BIK city area (bik)

Information on area code and postal code: federal state (land)

Information on area code and postal code: variable according to East/West mapping (region)

Sex : decided on basis of voice; when in doubt, ask (sex)

Age: How old are you? (age)

\_\_\_\_\_age in years

Which educational institution did you last attend or which is the highest level of education reached? (bild)

- I'm still going to school
- grade school or secondary school, with vocational training
- grade school or secondary school, without vocational training
- post secondary school without "abitur" (German university entrance qualification)
- "abitur", higher education entrance qualification, technical college qualification
- university degree
- no answer

Are you yourself employed? (beruf)

- yes (also if currently unemployed)
- no, incl. trainees, schoolchildren, students, senior citizens
- no answer

How many people live in your household (include yourself)? (hhgr)

- one person
- two persons
- three persons
- four persons
- five persons or more
- no answer

When you add up everything earned: how high is the monthly net income of your household, after deduction of taxes and social insurance? Does the net income vary?

I will now read a few income groupings and ask you to please tell me which applies to you (net)

- below EURO 500
- EURO 500 to EURO 1,000
- EURO 1,000 to below EURO 1,500
- EURO 1,500 to below EURO 2,000
- EURO 2,000 to below EURO 2,500
- EURO 2,500 to below EURO 3,000
- EURO 3,000 to below EURO 3,500
- EURO 3,500 to below EURO 4,000
- EURO 4,000 or more
- no answer

**Status:** approved by Prof. Brandt on 19 January 2011, final change 26 January 2011 (questions 4, 23)

**Screening question:**

**1. Have you already experienced visual height intolerance / height vertigo (an unpleasant feeling caused by visual exposure to heights)? (V1)**

 **One answer possible (SP)!**

 **Interviewer: Classify answers!**

Yes .....  → **Continue with question 2!**

Otherwise .....  → **Continue with question 2!**

-----  
No .....  → **Continue with question 22!**

Don't know .....  → **Continue with question 22!**

**2. How old were you when you first noticed height intolerance? (V2)**

 **One answer possible (SP)!**

\_\_\_\_\_ **age in years (test, must be larger than 5 but smaller than the current age)**

 **Do not read aloud!**

Don't know .....

No answer .....

**3. Where were you when you first experienced height intolerance?**

 **Multiple answers possible (MP)!**

 **Interviewer: Read the possible answers only if there is no response!**

A on a tower (V3\_11) .....

B in a ski lift / gondola (V3\_12) .....

C on a bridge (V3\_13) .....

D on steps (V3\_14) .....

E on a ladder (V3\_15) .....

F on a balcony (V3\_16) .....

G when looking out a window in a high-rise building (V3\_17) .....

H when wandering / mountain climbing (V3\_18) .....

I when rock climbing / during rock-climbing tour (V3\_19) .....

J other situation (V3\_20) .....

 **please enter:** \_\_\_\_\_ (q3t)

coded text (q3c1, q3c2)

 **Do not read aloud!**

- M Don't know. (V3\_98).....
- N No answer (V3\_99) .....

**4. Where do you now experience height intolerance (after the first time)?**

 **Multiple answers possible (MP)!**

 **Interviewer: Read aloud possible answers**

- A on a tower (V4\_11).....
- B in a ski lift / gondola (V4\_12) .....
- C on a bridge (V4\_13).....
- D on steps (V4\_14) .....
- E on a ladder (V4\_15).....
- F on a balcony (V4\_16) .....
- G when looking out a window in a high-rise building (V4\_17).....
- H when wandering / mountain climbing (V4\_18) .....
- I when rock climbing / during rock-climbing tour (V4\_19) .....
- K Height intolerance did not reoccur after the one time. (V4\_21).....
- J other situation (V4\_20) .....

 **please enter:** \_\_\_\_\_ (q4t)

Coded text (q4c1, q4c2)

 **Do not read aloud!**

- M Don't know (V4\_98).....
- N No answer (V4\_99) .....

**5. How does the height intolerance you experience express itself concretely?**

If answer option answer K is chosen (question 4), the question should be formulated as follows:

**What concretely do you experience when you have height intolerance? → Continue with question 9b!**

 **Multiple answers possible (MP)!**

 **Interviewer: Read the possible answers aloud!**

- A giddiness (V5\_11) .....
- B postural (to-and-fro) vertigo, as if on a boat (V5\_12) .....
- C inner agitation (V5\_13) .....
- D trembling (V5\_14).....
- E sudden, profuse sweating (V5\_15).....
- F palpitations (V5\_16).....

- G fearfulness (V5\_17) .....
  - H instability of stance and gait (V5\_18).....
  - I queasy feeling in the stomach region (V5\_19) .....
  - J weakness in the knees (V5\_20) .....
  - K other (V5\_21) .....
-  **please enter:** \_\_\_\_\_ (q5t)  
 coded text (q5c1, q5c2)

 **Don't read aloud!**

- L Don't know. (V5\_98).....
- M No answer (V5\_99) .....

**6. Now we want to know how height intolerance has developed since the first time you experienced it. I will now read several possible answers to you. Please indicate which applies best. (V6)**

 **Only one answer possible (SP)!**

 **Interviewer: Read aloud possible answers!**

- A Since the first time, height intolerance has reoccurred again and again in the same situation...
- B Since the first time, height intolerance has reoccurred again and again in the same situation, but more seldom. ....
- C Since the first time, height intolerance has also occurred in different situations. ....

 **Don't read aloud!**

- G Don't know.....
- H No answer .....

**7. Now we want to know how height intolerance has developed over the course of time since you first experienced it in the one situation. I will now read different possible answers. Please indicate which applies best. (V7)**

Height intolerance subsequently reoccurred (after the first time), but it hasn't occurred for more than 10 years now.....  → **Continue with question 9!**

Height intolerance subsequently reoccurred (after the first time); however, it hasn't occurred for several years now.....  → **Continue with question 9!**

Height intolerance subsequently reoccurred (after the first time); however, it hasn't occurred for months now. ....  → **Continue with question 8!**

Height intolerance subsequently reoccurred again and again (after the first time). .....  → **Continue with question 8!**

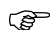

**Don't read aloud!**

Don't know.....

No answer .....

**8. How often has height intolerance reoccurred in the last 12 months? (V8)**

\_\_\_\_\_ *frequency (three-digit number)*

**Not once/ not at all**.....

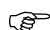

**Don't read aloud!**

Don't know.....

No answer .....

**9. When height intolerance occurs, does it influence your behavior during wandering / mountain climbing (or rock climbing)? I will read different possible answers.**

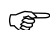

**Multiple choice with restrictions A and B**

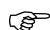

**Interviewer: Read possible answers!**

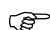

**Note to programmer: In case the possible answer A occurs, continue with 9b; if B occurs, continue with 12, otherwise read possible answers C,D,E,F,G,H,I,J, in their order and make a cross when the answer fits the behavior.**

A I don't go wandering. (V9\_11) .....  → **Continue with question 9b**

B It doesn't affect my behavior during wandering or mountain climbing (V9\_12)....  → **Continue with 12**

-----trifft zu

C I am able to control it so that I can continue without any substantial restrictions (V9\_13) .....

D I can continue only with great effort (V9\_14).....

E I have to take a longer break before I can continue (V9\_15) .....

F I have to break off the mountain or rock-climbing tour (V9\_16) .....

→ Continue with question 10

G I have to change my route (V9\_17) .....

→ Continue with question 11

H My behavior in the mountains has fundamentally changed because of height intolerance, i.e., I undertake different tours than I used to (for example, instead of rock climbing, I only do easy hikes) (V9\_18) .....

I I don't undertake any hikes or wander any more because of height intolerance (V9\_19).....

J I undertake more hikes in the mountains because of height intolerance (V9\_20) .....

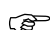

**Don't read aloud!**

L Don't know (V9\_98).....

M No answer (V9\_99) .....



**Note to programmer: If possible answers F and G are not indicated, continue with question 12**

**10.** How often have you had to break off a mountain / rock-climbing tour in the last 10 years because of height intolerance? (V10) .....

↳ Please read possible answers aloud.

- 1x .....
- 2-5x .....
- 5-10x .....
- more than 10x .....
- Every time.....

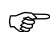

**Note to programmer: Only ask question 10, if possible answer F was given for question 9.**

➔ **Continue with question 12**

**11.** How often in the last 10 years have you had to change your route because of height intolerance? (V11)

↳ Please read possible answers aloud.

- 1x .....
- 2-5x .....
- 5-10x .....
- more than 10x .....
- Every time.....

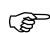

**Note to programmer: Only ask question 11, if possible answer G was given for question 9.**

➔ **Continue with question 12**

**9b.** When height intolerance occurs, independently of mountain tours, which behavior is/was typical for you? (V91)

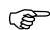

**One possible answer (SP)!**

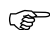

**Interviewer: Read possible answers aloud!**

- A I avoid the trigger situation .....
- B I don't change my behavior .....
- C I intentionally expose myself to the trigger situation.....

**12. Which approach is/was most characteristic for you when you experience / experienced height**

**intolerance? *One answer possible (SP)! (V12)***

 **Interviewer: Read aloud possible answers!**

- A I can talk freely about it with accompanying persons.....
- B I can only talk freely about it with close friends who know about my “weakness“.....
- C I try to cover up my height intolerance.....

 **Don't read aloud!**

- D Don't know.....
- E No answer .....

**13. Have you already asked for help to deal with your height intolerance? (V13)**

 **One answer possible (SP)!**

 **Interviewer: classify possible answers!**

- A Yes.....  → **Continue with question 14!**
- B No.....  → **Continue with question 17!**

 **Don't read aloud!**

- C Don't know.....  → **Continue with question 17!**
- D No answer.....  → **Continue with question 17!**

**14. In which concrete situation have you asked for help with your height intolerance?**

 **One answer possible (SP)!**

In Situation:  **please enter:** \_\_\_\_\_  (q14t) → **Continue with question 15!**  
 Coded text (q14c1, q14c2)

 **Don't read aloud!**

- C Don't know.....  → **Continue with question 15!**
- No answer .....  → **Continue with question 15!**

**15. How often has this occurred, since you realized that you had height intolerance? (V15)**

\_\_\_\_\_ **frequency (three digits)**

 **Don't read aloud!**

- F Don't know.....
- G No answer .....

**16. What kind of help did you require?**

 **Multiple answers possible (MP)!**

 **Interviewer: classify answers!**

- A help of accompanying persons (V16\_1).....
- B help of the mountain rescue service (V16\_2).....
- C help of other persons (V16\_3).....
- D emergency medical rescue (V16\_4).....
- E other help (V16\_5).....

 **please enter:** \_\_\_\_\_(q16t)

Coded text (q16c1)

 **Don't read aloud!**

- F Don't know (V16\_8).....
- G No answer (V16\_9) .....

**17. Have you already been to the doctor for your height intolerance? (V17)**

 **One possible answer (SP)!**

 **Interviewer: classify the answers of the participant!**

A Yes.....  → **Continue with 18!**

B No.....  → **Continue with 17b!**

C Don't know .....  → **Continue with 22!**

D No answer.....  → **Continue with 22!**

**17b. Have you developed your own way to treat your height intolerance? (V171)**

A Yes.....  → **Continue with 17c!**

B No.....  → **Continue with 22!**

**17 c) If yes, which way?**



.....(q17t) Continue with 22

Coded text (q17c1, q17c2, q17c3, q17c4)

**18. What kind of doctor have you consulted?**

 **Multiple answers possible (MP)!**

 **Interviewer: read possible answers aloud!**

- A General practitioner (V18\_1) .....
- B ENT doctor (V18\_2) .....
- C Neurologist (V18\_3) .....
- D Internist (V18\_4) .....
- E Psychiatrist / psychologist (V18\_5) .....
- F Other specialities (V18\_6) .....

 **please enter:** .....(q18t)

Coded text (q18c1)

 **Don't read aloud!**

- G Don't know (V18\_8) .....
- H No answer (V18\_9) .....

**19. Did you go to the doctor for only an examination or for an examination and treatment? (V19)**

 **One answer possible (SP)!**

- A Only for an examination .....

 What did the doctor diagnose?

A1 **Please enter the diagnosis:** .....(19at) and (19ac1, 19ac2) → **Continue with question 22!**

A2 I can't recall the diagnosis any more.  → **Continue with question 22!**

- B For an examination and treatment

 What did your doctor diagnose?

B1 **Please enter the diagnosis:** .....(19bt) and (19bc1, 19bc2) → **Continue with question 20!**

B2 I can't recall the diagnosis any more.  → **Continue with question 20!**

 **Don't read aloud!**

- C Don't know .....  → **Continue with question 22!**
- D No answer .....  → **Continue with question 22!**

**20. What type of treatment did you have?**

 **Multiple answers possible (MP)!**

 **Interviewer: read possible answers aloud!**

- A medicine (V20\_1) .....
- B behavioral instructions (V20\_2) .....
- C behavioral therapy (V20\_3) .....
- D other psychotherapy (V20\_4) .....
- D a different therapy (V20\_5) .....

 **please enter the different therapy:** \_\_\_\_\_ (q20t)

Coded text (q20c1, q20c2)

- E treatment refused (V20\_6) .....

 **Don't read aloud!**

- F Don't know (V20\_8) .....
- G No answer (V20\_9) .....

**21. Did the therapy improve your height intolerance, worsen it, or did it remain unchanged? (V21)**

 **One answer possible (SP)!**

 **Interviewer: assign to possible answers!**

- A Improved .....
- B Worsened .....
- C Unchanged .....

 **Don't read aloud!**

- D Don't know .....
- E No answer .....

**22. Are there cases of height intolerance among your close relatives? (V22)**

 **One answer possible (SP)!**

Yes .....  → **Continue with question 22b!**

No .....  → **Continue with question 23!**

 **Interviewer: assign to answers possible!**

 **22 b) Who?**

 **Multiple answers possible (MP)!**

 **Interviewer: assign to answers possible!**

- grandparents (V222\_1) .....
- parents (V222\_2).....
- brothers and/or sisters (V222\_3).....
- children (V222\_4) .....
- other relatives (V222\_5) .....
- Don't know (V222\_8) .....
- Unknown, no answer (V222\_9) .....

**23. Are you prone to or do you have the following (other) illnesses? Please indicate which of these susceptibilities / illnesses apply to you!**

 **Multiple answers possible**

 **Note to programmer: (“other“) should be deleted if participant answered “no“ or “don't know“ / gave no answer to the screening question (question 1).**

 **Interviewer: read possible answers aloud!**

- |                                                                                                                          | <b>Trifft<br/>zu</b>     |
|--------------------------------------------------------------------------------------------------------------------------|--------------------------|
| A migraine (V23_11).....                                                                                                 | <input type="checkbox"/> |
|  <b>If “applies“, specify:</b>        |                          |
| A1 During a migraine attack I am especially susceptible to height intolerance (V231).....                                | <input type="checkbox"/> |
| B motion sickness (e.g., nausea during travel by ship or car) (V23_12) .....                                             | <input type="checkbox"/> |
| C Menière's disease (pronounce “Meniär“; give a definition) (V23_13).....                                                | <input type="checkbox"/> |
| D other illnesses with symptoms of dizziness (V23_14) .....                                                              | <input type="checkbox"/> |
| E anxiety (V23_15) .....                                                                                                 | <input type="checkbox"/> |
| F panic attacks (V23_16).....                                                                                            | <input type="checkbox"/> |
| G phobias or anxiety disorder (V23_17).....                                                                              | <input type="checkbox"/> |
| H Don't know (V23_98) .....                                                                                              | <input type="checkbox"/> |
| I No answer (V23_99) .....                                                                                               | <input type="checkbox"/> |
| <br> <b>If “applies“, which does?</b> |                          |
| G1 agoraphobia (open spaces) (V232_1) .....                                                                              | <input type="checkbox"/> |
| G2 claustrophobia (V232_2 ) .....                                                                                        | <input type="checkbox"/> |
| G3 animal phobias (e.g., spiders) (V232_3).....                                                                          | <input type="checkbox"/> |
| G4 cardiophobia (V232_4) .....                                                                                           | <input type="checkbox"/> |
| G5 acrophobia (V232_5).....                                                                                              | <input type="checkbox"/> |
| G6 other phobias (V232_6).....                                                                                           | <input type="checkbox"/> |

↳ **Please enter:** \_\_\_\_\_ (q232t)

*Coded text (q232c1, q232c2)*

G7 Don't know (V232\_8).....

G8 No answer (V232\_9) .....

P Other illness which you think could be associated with height intolerance (occurs only during height intolerance) (V23\_18).....

↳ ↳ **Please enter:** \_\_\_\_\_ (q23t)

*Coded text (q23c1, q23c2)*

Q none of the cited (V23\_19) .....
